# Supplementary material
Source: bioRxiv or medRxiv preprint supplement (https://medrxiv.org/highwire/filestream/81910/field_highwire_adjunct_files/0/2020.04.26.20080911-1.pdf)
Supplement: Supplementary file [file 2020.04.26.20080911-1.pdf]

Supplementary Materials for

**False positives in reverse transcription PCR testing for SARS-CoV-2**

Andrew N. Cohen, Bruce Kessel

Correspondence: [acohen@bioinvasions.com](mailto:acohen@bioinvasions.com)

|                          |    |
|--------------------------|----|
| Methods .....            | 2  |
| Supplementary Text ..... | 6  |
| Figures S1 to S6 .....   | 7  |
| Tables S1 to S5 .....    | 13 |
| References .....         | 20 |

## Methods

### Estimating a conservative false positive rate (FPR)

Absent data on the clinical specificity of SARS-CoV-2 RT-PCR assays, we estimated the false positive rate (FPR) through a meta-analysis of external quality assessments (EQAs) of similar assays. We searched online for reports on EQAs of diagnostic laboratories conducting RT-PCR assays for other RNA viruses. We excluded EQAs prior to 2004, since many of the assays relied on older RT-PCR methods that may be less accurate. For each remaining EQA we extracted or calculated the total number of negative samples assayed, the total number of positive results returned on negative samples, and the resulting FPR for the EQA. Where we could only determine a range, we conservatively took the FPR as the lower bound of the range. In EQAs where no negative samples were reported as positive, we reported the FPR in Tables 1 and S5 as below a detection limit equal to the reciprocal of the total number of negative samples, but for statistical analysis treated the FPR as zero. We calculated the median value and interquartile range for these FPR data and also for a subset restricted to EQAs with >100 negative samples. We used the lower of the 25th percentile values from these two data sets as an estimate of the FPR in SARS-CoV-2 RT-PCR testing programs in order to model the effect of FPR on the reliability of test results.

### Estimating the false negative rate (FNR)

We searched on-line for studies that estimated FNRs in SARS-CoV-2 RT-PCR testing. We used the midpoint of the rounded-off range of reported FNR estimates to model the effect of FPR on test results, and performed a sensitivity analysis across the rounded-off range.

### Calculation of test positivity rates

We obtained online test data for countries and US states and calculated the test positivity rate on a cumulative and 7-day-moving-average basis.

### Derivation of formulae

To model the impact of the FPR on the reliability of test results, we derived formulae for calculating the relevant test statistics from the test positivity rate, FNR and FPR.

Let:  $N$  = the number of samples tested

$Prev$  = the **Test Prevalence Rate** (the number of infected individuals that are tested divided by the number of individuals that are tested)

$Pos$  = the **Test Positivity Rate** (the number of positive test results divided by the number of individuals that are tested);

$FPR$  = the **False Positive Rate** (the number of uninfected individuals that test positive divided by the number of uninfected individuals that are tested); =  $1 - Specificity$  ( $Specificity$  = the fraction of uninfected individuals that test negative)

$FNR$  = the **False Negative Rate** (the number of infected individuals that test negative divided by the number of infected individuals that are tested); =  $1 - Sensitivity$  ( $Sensitivity$  = the fraction of infected individuals that test positive)

$PPV$  = the **Positive Predictive Value** (the number of true positive test results divided by the number of positive (true positive + false positive) test results)

$NPV$  = the **Negative Predictive Value** (the number of true negative test results divided by the number of negative (true negative + false negative ) test results) with all rate functions limited to values between 0 and 1.

The number of infected individuals among those tested is  $Prev \cdot N$ ; the number of these that test negative (false negatives) is  $FNR \cdot Prev \cdot N$ , and the number that test positive (true positives) is  $(1 - FNR) \cdot Prev \cdot N$ .

Also, the number of uninfected individuals is  $(1 - Prev) \cdot N$  and the number of these that test positive (false positives) is  $FPR \cdot (1 - Prev) \cdot N$ , and the number that test negative (true negatives) is  $(1 - FPR) \cdot (1 - Prev) \cdot N$ .

The total number of individuals that test positive is the sum of the true positives and the false positives =  $(1 - FNR) \cdot Prev \cdot N + FPR \cdot (1 - Prev) \cdot N$ . Dividing this sum by  $N$  gives the **Test Positivity Rate**:

$$Pos = \frac{(1 - FNR) \cdot Prev \cdot N + FPR \cdot (1 - Prev) \cdot N}{N}$$

$$Pos = (1 - FNR) \cdot Prev + FPR \cdot (1 - Prev) \quad \text{Eq. 1}$$

Rearranging Equation 1 yields the **Test Prevalence Rate**:

$$Prev = \frac{Pos - FPR}{1 - FNR - FPR} \quad \text{Eq. 2}$$

Equation 2 yields negative values for  $Prev$  when  $FPR > Pos$ , and values  $> 1$  when  $FNR > 1 - Pos$ . As such values are not allowed for rate functions,  $Prev$  should be constrained to 0 when  $FPR > Pos$  and to 1 when  $FNR > 1 - Pos$ .

The **Positive Predictive Value** (the true positives divided by the total positives) is:

$$PPV = \frac{(1 - FNR) \cdot Prev \cdot N}{(1 - FNR) \cdot Prev \cdot N + FPR \cdot (1 - Prev) \cdot N}$$

$$= \frac{(1 - FNR) \cdot Prev}{(1 - FNR) \cdot Prev + FPR \cdot (1 - Prev)}$$

Substituting in  $Pos$  from equation 1,

$$PPV = \frac{(1 - FNR) \cdot Prev}{Pos}$$

Substituting for  $Prev$  from equation 2 and rearranging yields:

$$PPV = \frac{FNR \cdot Pos + FPR - FNR \cdot FPR - Pos}{(FNR + FPR - 1) \cdot Pos} \quad \text{Eq. 3}$$

The **Negative Predictive Value** (the true negatives divided by the total negatives) is:

$$\begin{aligned}
 NPV &= \frac{(1-FPR) \cdot (1-Prev) \cdot N}{(1-FPR) \cdot (1-Prev) \cdot N + FNR \cdot Prev \cdot N} \\
 &= \frac{(1-FPR) \cdot (1-Prev)}{(1-FPR) \cdot (1-Prev) + FNR \cdot Prev} \\
 &= \frac{(1-FPR) \cdot (1-Prev)}{1 - ((1-FNR) \cdot Prev + FPR \cdot (1-Prev))}
 \end{aligned}$$

Substituting in  $Pos$  from equation 1,

$$NPV = \frac{(1-FPR) \cdot (1-Prev)}{1-Pos}$$

Substituting for  $Prev$  from equation 2 and rearranging yields:

$$NPV = \frac{FNR + FPR + Pos - FPR \cdot Pos - FNR \cdot FPR - 1}{(FNR + FPR - 1) \cdot (1 - Pos)} \quad \text{Eq. 4}$$

#### Sample-based and individual-based data

The meta-analysis of EQAs yields FPR estimates on a sample basis. In our modeling, we apply an FPR estimate derived from the EQA data to available state and national test data. These test data are usually reported on an individual basis, with an individual classified as positive if testing positive in a single RT-PCR test (12, 14).

If some individuals are tested more than once, then the FPR on a sample basis (that is, the number of samples from uninfected individuals that test positive divided by the number of samples from uninfected individuals that are tested) can differ from the FPR on an individual basis (the number of uninfected individuals that test positive at least once divided by the number of uninfected individuals that are tested). We show here that the FPR on a sample basis will tend to be less than or equal to the FPR on an individual basis, so that our application of a sample-based FPR estimate to individual-based data will tend to understate the impact of false positives.

We define an infected individual as an individual who is shedding virus at the time of at least one test, and an uninfected individual as an individual who is not shedding virus at the time of any of the tests.

Let:  $N_{Uninf}$  = the number of uninfected individuals tested

$FP$  = the number of uninfected individuals who test positive at least once, i.e. the number of false positive individuals

$FP_1$  = the number of uninfected individuals who test positive on their first test

$FPR_S$  = the false positive rate on a sample basis

$FPR_I$  = the false positive rate on an individual basis.

Consider the set of samples from the first tests of the tested individuals. There are  $N_{Uninf}$  samples taken from uninfected individuals in this set, and the expected number of false positive samples is:

$$FP_1 \approx FPR_S \cdot N_{Uninf} \quad \text{Eq. 1}$$

Now if some individuals are tested more than once, these re-tests will be distributed in some fashion over the individuals tested: some may be tested twice, some three times, etc. First consider the case where any false positives that occur in a re-test happen either to an infected individual (that is, an individual who was shedding virus during at least one test but not at the time of the false positive test) or to an uninfected individual who tested positive on the first test. These false positives are thus "wasted" in the sense that they don't produce any additional false positive individuals, so:

$$FP = FP_1$$

So the FPR on an individual basis is:

$$FPR_I = \frac{FP}{N_{Uninf}} = \frac{FP_1}{N_{Uninf}} \approx FPR_S$$

Now consider the other case, where one or more of the false positives that occur in a re-test happen to an uninfected individual who did not test positive on the first test. Then these false positives produce additional false positive individuals, so:

$$FP > FP_1$$

$$FPR_I = \frac{FP}{N_{Uninf}} > \frac{FP_1}{N_{Uninf}}$$

And from Equation 1:

$$FPR_I > FPR_S$$

So  $FPR_I$  is always either about equal to or greater than  $FPR_S$ , and applying an estimate of  $FPR_S$  to data aggregated on an individual basis will tend to underestimate the effect of a given FPR.

At least one U.S. state (New York) reports its test data as data on individuals but defines an "individual" as follows: if multiple samples are taken from an individual on a single day and tested this counts as one individual tested, but if the individual is sampled and tested on multiple days these are counted as multiple individuals tested. By a proof similar to the one given above, the FPR on an "individual" basis will then be either about equal to or greater than the FPR on a sample basis.

Italy initially reported "mixed" test data, that is, the number of tests were reported on a sample basis (*tamponi*) while the results were reported on an individual basis (*casi totali*). Beginning on April 23 Italy also reported the number of tests on an individual basis (*casi testati*). For modeling, we estimated the number of tests on an individual basis for dates prior to April 23 by multiplying the reported number of *tamponi* by the ratio between cumulative number of *casi testati* and *tamponi* on April 23.

It is not always clear how test data are reported by a state or country, and in some cases the reporting method may confound the application of a sample-based FPR estimate to the test data. However, if the number of re-tests is small relative to total tests the error should be small.

## Supplementary Text

We searched Google Scholar for studies published in any language from Jan 1, 2020 to April 25, 2020 using the terms "SARS-CoV-2", "COVID-19", "coronavirus" or "nCoV" AND "false positive" or "specificity" AND "PCR". We found 34 papers that mentioned false positives or specificity in the context of SARS-CoV-2 testing, including unpublished preprints and one retracted study. Twenty-five of these studies made only brief or incidental mention of false positives or specificity. One published study, three unpublished studies and one retracted study assumed or roughly estimated false positive rates between 0% and 10% as inputs to models, including two pooled-sampling optimization models and three models exploring the effects of false positives on certain epidemiological statistics. One published and three unpublished studies (listed in Tables S3 and S4) mentioned false positives encountered while conducting sensitivity analyses or cross-reactivity assessments of SARS-CoV-2 RT-PCR assays.

Guidance documents from the World Health Organization (WHO) (*12, 15, 16*) and the U.S. Centers for Disease Control and Prevention (CDC) (*13*) on RT-PCR testing for SARS-CoV-2 make no mention of false positives or any concerns about specificity.

There have been several studies and considerable media coverage of false negative results in SARS-CoV-2 RT-PCR tests (Table S2) (*4*) and of false positive results in SARS-CoV-2 antibody tests (*17-19*), but we found only limited media discussion of false positive results in SARS-CoV-2 RT-PCR tests. Most of this was in regard to three incidents: **1**) initial false positives in the CDC's RT-PCR test caused by a contaminated reagent produced in a CDC laboratory (*20, 21*), **2**) U.S. health officials stating that a study found that WHO's or China's SARS-CoV-2 test had a false positive rate of 47% (*22, 23*) (though the study didn't find that (*24*)), and **3**) a dispute involving the Malaysian and Cambodian governments and the CDC over whether a cruise ship passenger's test result was a true positive or false positive (*25*). There are also a small but rising number of records of apparent (*26-33*) or possible (*34-36*) false positives occurring during regular SARS-CoV-2 RT-PCR testing.

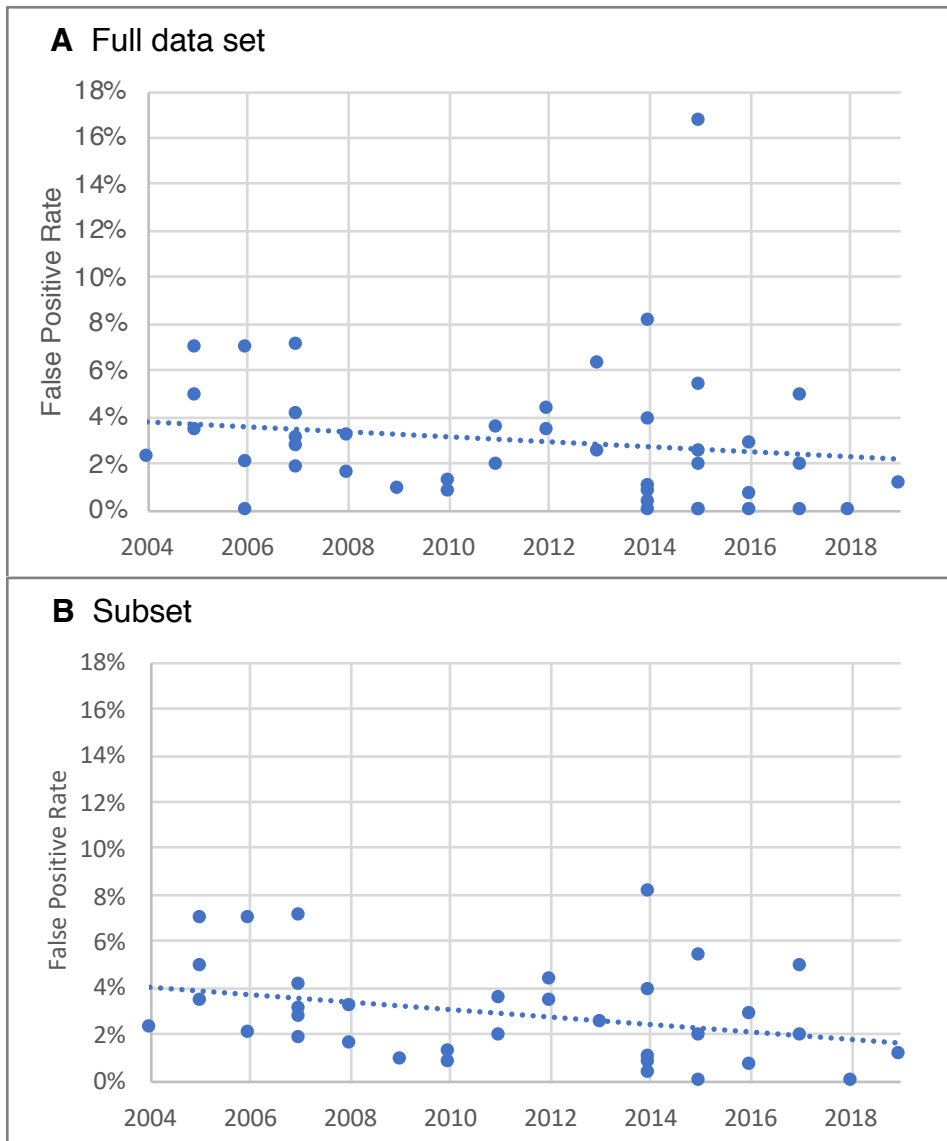

**Figure S1. False positive rates in external quality assessments of RT-PCR assays of RNA viruses over time.** (A) Full data set; linear regression shown as a dotted line ( $n=43$ ,  $r=0.147$ ,  $p=0.346$ ). (B) Same as A, but for a subset comprising EQAs with  $>100$  negative samples ( $n=37$ ,  $r=0.327$ ,  $p=0.056$ ).

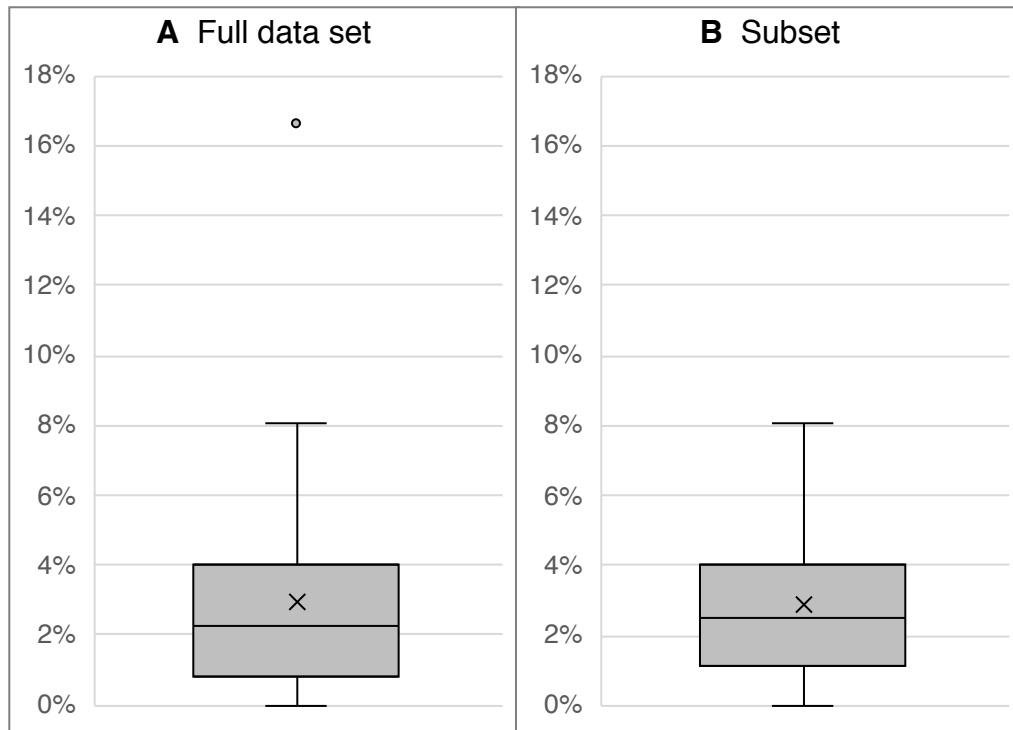

**Figure S2. Distributions of false positive rates in external quality assessments of RT-PCR assays of RNA viruses. (A) Full data set. (B) Subset comprising EQAs with >100 negative samples.**



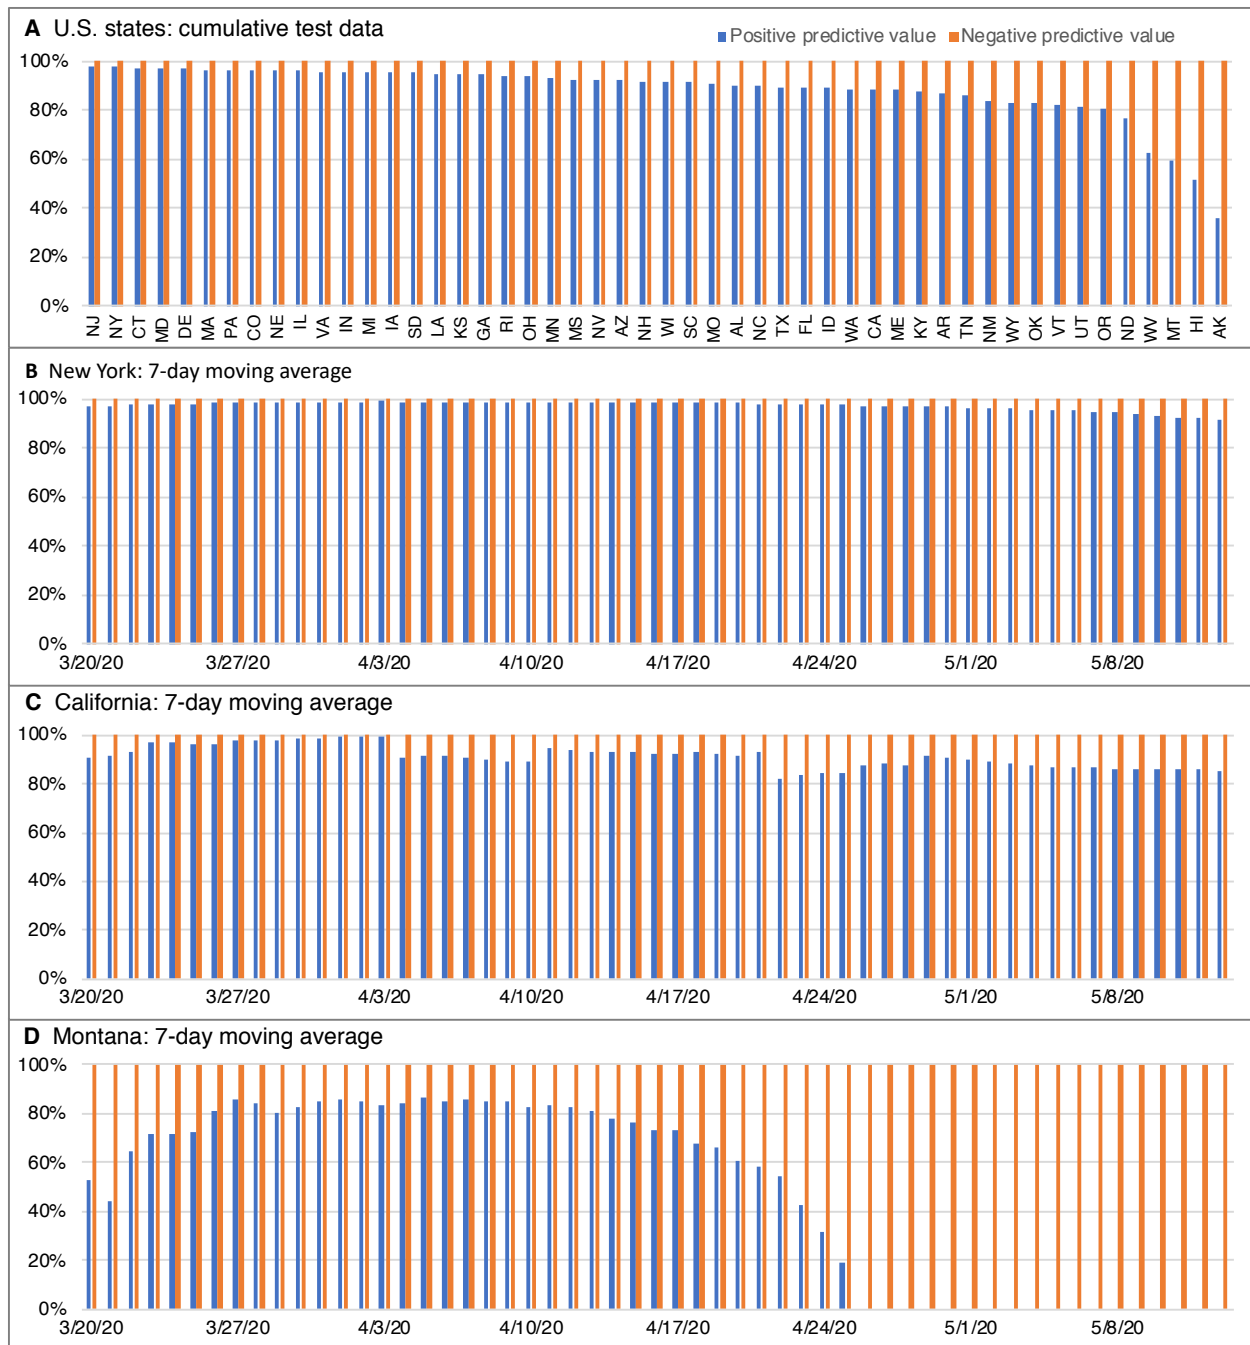

**Figure S3. Reliability of SARS-CoV-2 test results in the United States: sensitivity tests with a false negative rate of 0%.** As in Figure 1 but with a false negative rate of 0%. Positive predictive value (the probability that a positive result is true) and negative predictive value (the probability that a negative result is true) calculated with a false positive rate of 0.8%. (A) Results for the 50 U.S. states based on cumulative test data through May 13, 2020. States arranged left to right in order of decreasing test positivity. (B-D) Reliability trajectories based on the previous-7-day moving average for states with positive test results with high reliability (New York), reliability starting to decline (California), and steeply declined reliability (Montana). Test data are from The COVID Tracking Project (<https://covidtracking.com/about-data> accessed May 14, 2020).

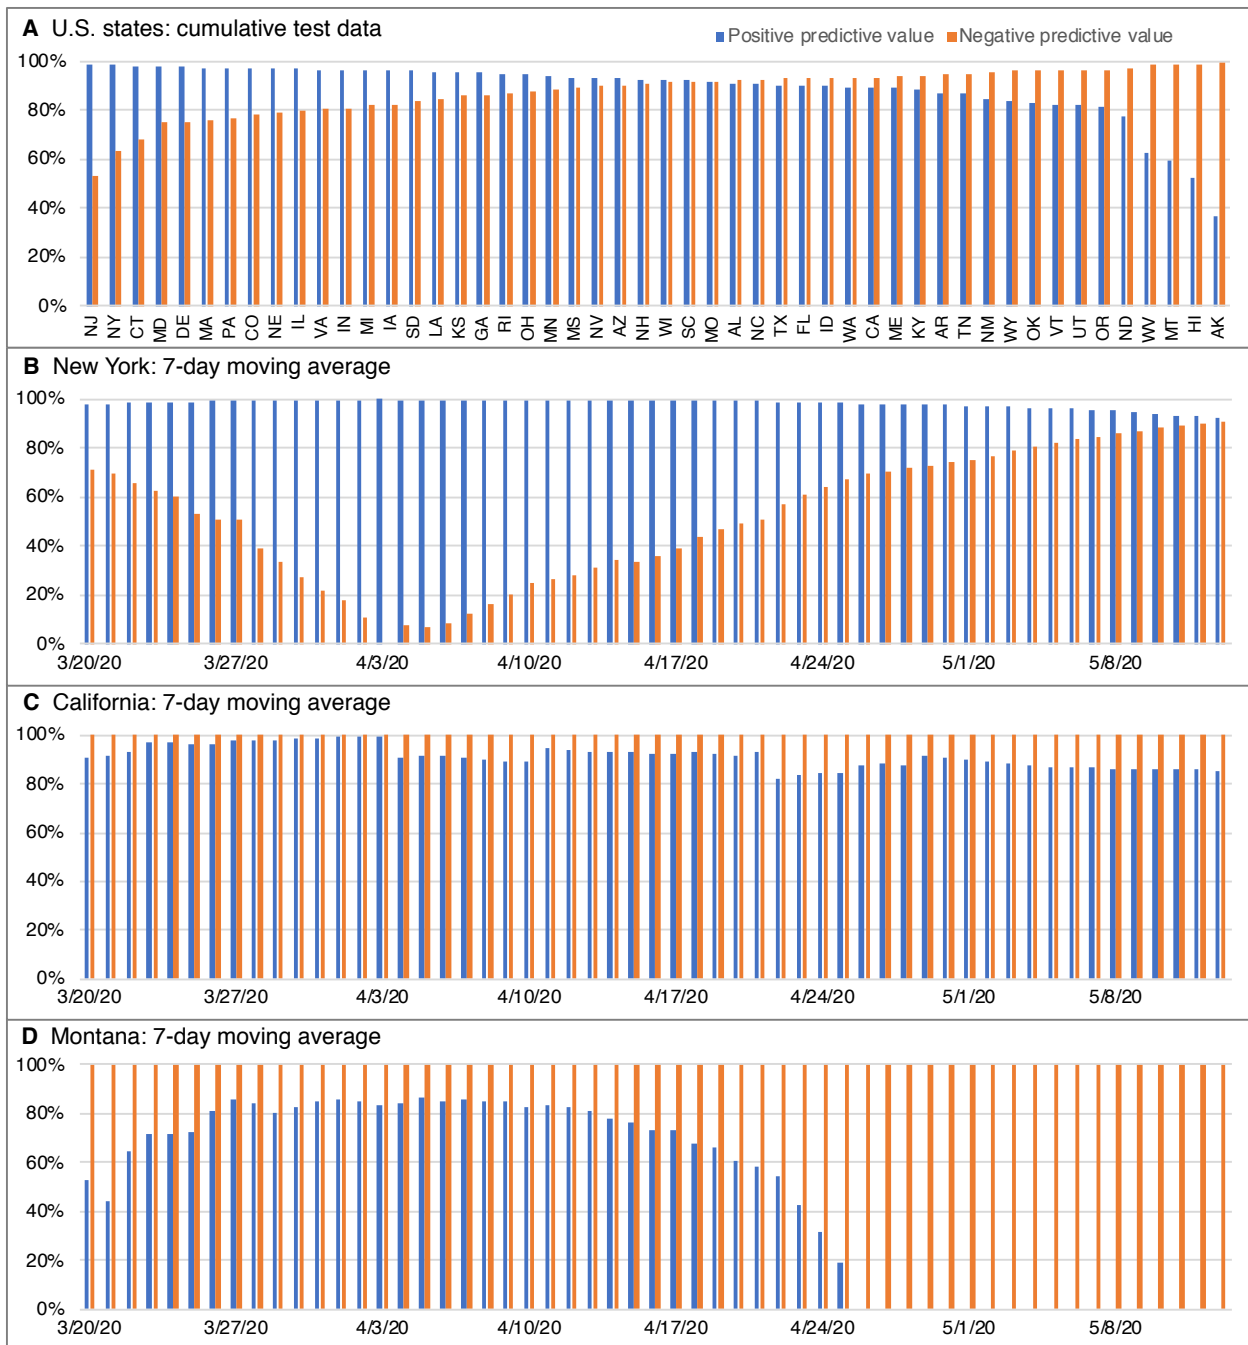

**Figure S4. Reliability of SARS-CoV-2 test results in the United States: sensitivity tests with a false negative rate of 50%.** As in Figure 1 but with a false negative rate of 50%. Positive predictive value (the probability that a positive result is true) and negative predictive value (the probability that a negative result is true) calculated with a false positive rate of 0.8%. (A) Results for the 50 U.S. states based on cumulative test data through May 13, 2020. States arranged left to right in order of decreasing test positivity. (B-D) Reliability trajectories based on the previous-7-day moving average for states with positive test results with high reliability (New York), reliability starting to decline (California) and steeply declined reliability (West Virginia). Test data are from The COVID Tracking Project (<https://covidtracking.com/about-data> accessed May 14, 2020).

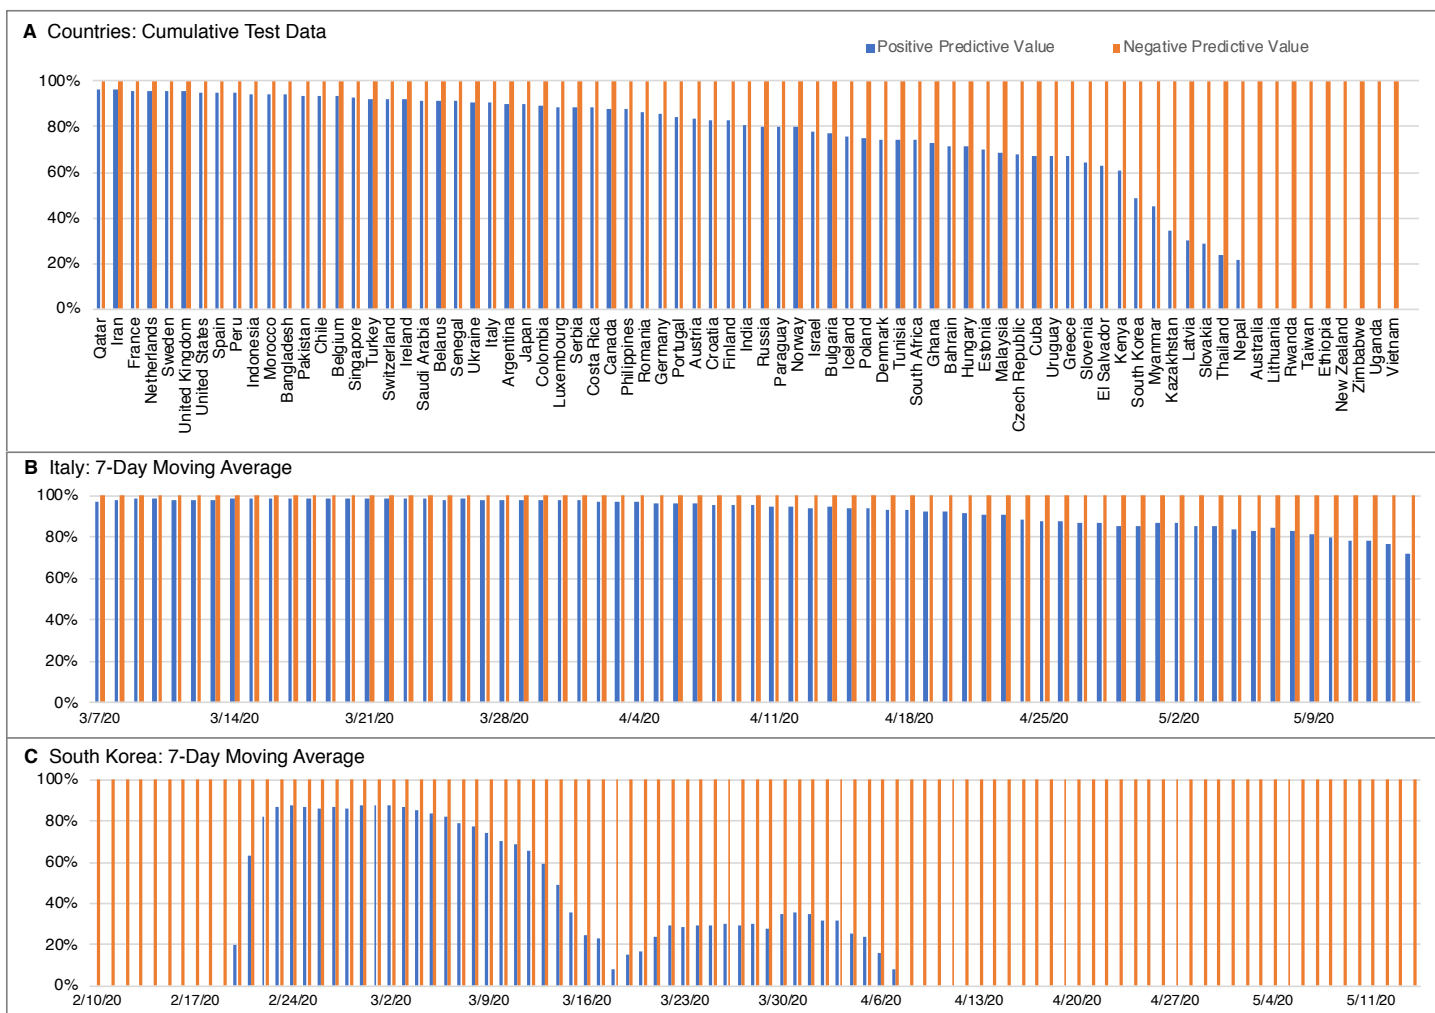

**Figure S5. Reliability of SARS-CoV-2 test results in different countries: sensitivity tests with a false negative rate of 0%.** As in Figure 2 but with a false negative rate of 0%. Positive predictive value (the probability that a positive result is true) and negative predictive value (the probability that a negative result is true) calculated with a false positive rate of 0.8%. (A) Results for 77 countries based on cumulative test data through the most recent available date (between April 29 and May 14, 2020). Countries arranged left to right in order of decreasing test positivity. (B-C) Reliability trajectories based on the previous-7-day moving average for countries with positive test results with declining reliability (Italy) and sharply declined reliability (South Korea). Cumulative test data are from Our World in Data (<https://github.com/owid/covid-19-data/tree/master/public/data/> accessed May 14, 2020). Daily test data are from the Italian Ministry of Health (<http://www.salute.gov.it/portale/nuovocoronavirus/archivioNotizieNuovoCoronavirus.jsp?lingua=italiano&menu=notizie&p=dalministro&area=nuovocoronavirus&notizie.page=0> accessed May 14, 2020) and the South Korean Centers for Disease Control and Prevention (<https://www.cdc.go.kr/board/board.es?mid=&bid=0030> accessed May 14, 2020).

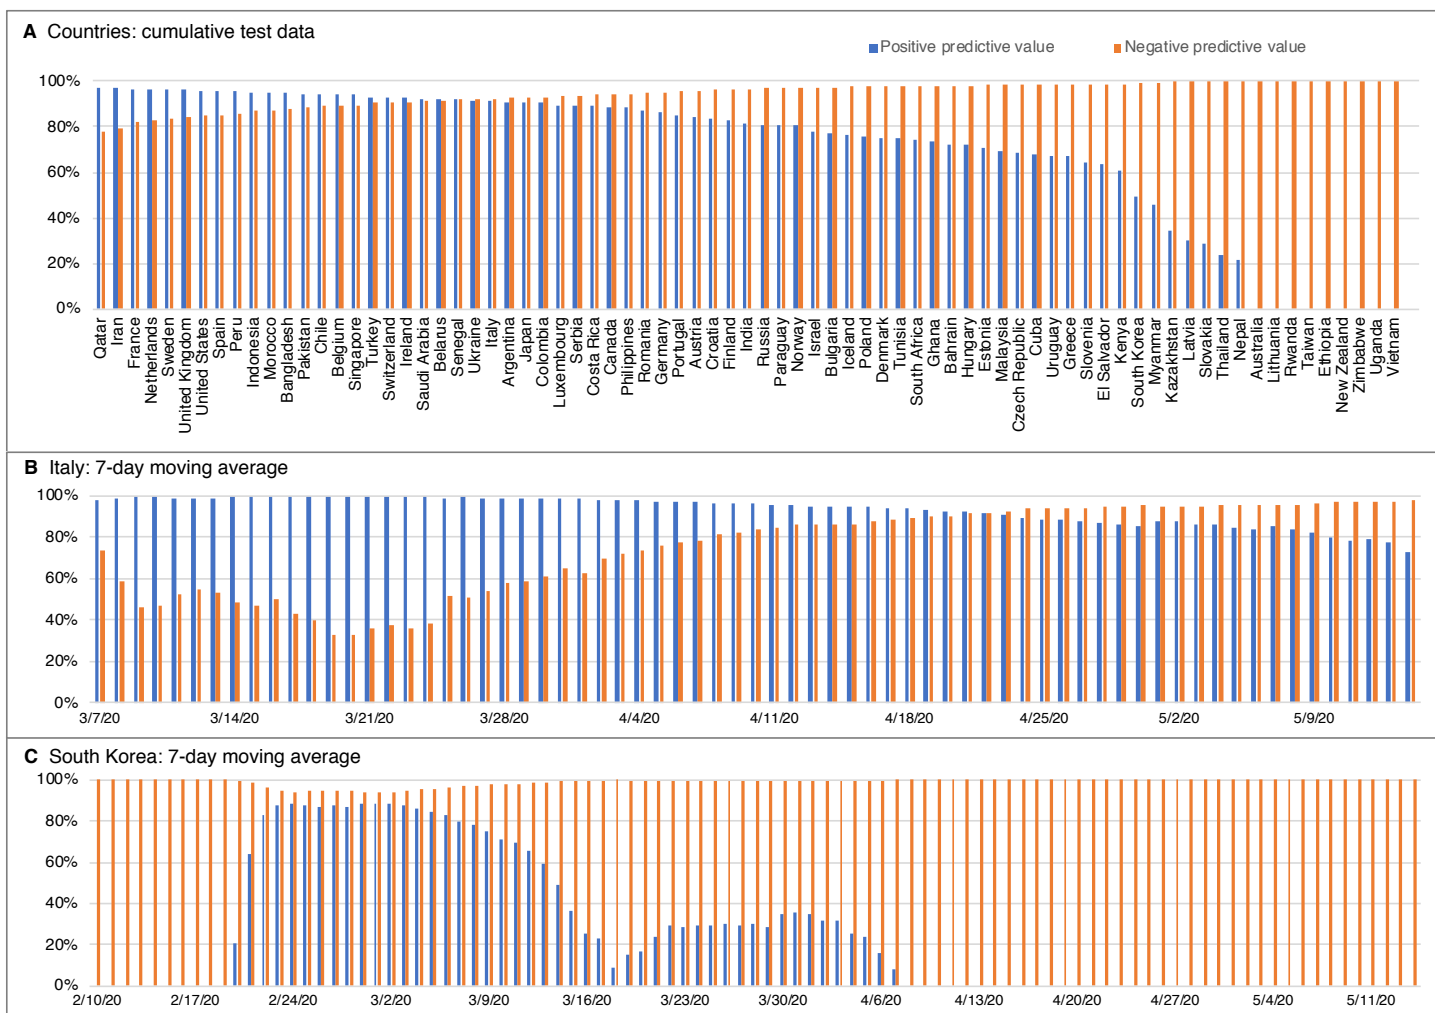

**Figure S6. Reliability of SARS-CoV-2 test results in different countries: sensitivity tests with a false negative rate of 50%.** As in Figure 2 but with a false negative rate of 50%. Positive predictive value (the probability that a positive result is true) and negative predictive value (the probability that a negative result is true) calculated with a false positive rate of 0.8%. (A) Results for 77 countries based on cumulative test data through the most recent available date (between April 29 and May 14, 2020). Countries arranged left to right in order of decreasing test positivity. (B-C) Reliability trajectories based on the previous-7-day moving average for countries with positive test results with declining reliability (Italy) and sharply declined reliability (South Korea). Cumulative test data are from Our World in Data (<https://github.com/owid/covid-19-data/tree/master/public/data/> accessed May 14, 2020). Daily test data are from the Italian Ministry of Health (<http://www.salute.gov.it/portale/nuovocoronavirus/archivioNotizieNuovoCoronavirus.jsp?lingua=italiano&menu=notizie&p=dalministro&area=nuovocoronavirus&notizie.page=0> accessed May 14, 2020) and the South Korean Centers for Disease Control and Prevention (<https://www.cdc.go.kr/board/board.es?mid=&bid=0030> accessed May 14, 2020).

**Table S1. Reported specificity of SARS-CoV-2 RT-PCR assays based on *in vitro* cross-reactivity assessments.** These include 20 of the 68 RT-PCR assays that received U.S. Food and Drug Administration Emergency Use Authorizations through April 30, 2020, and all four of the assays that received World Health Organization Emergency Use Listings by that date.

| Laboratory or manufacturer                                                        | Test                                            | Authorization                          | Negative samples | Positive results | Specificity | Reference |
|-----------------------------------------------------------------------------------|-------------------------------------------------|----------------------------------------|------------------|------------------|-------------|-----------|
| Abbott Diagnostics Scarborough, Inc.                                              | ID NOW COVID-19                                 | EUA/Commercial<br>3/27/20              | 30               | 0                | 100%        | 37        |
| Abbott Molecular, Inc.                                                            | Abbott RealTime SARS-CoV-2 assay                | EUA/Commercial<br>3/18/20, EUL 4/9/20  | 150              | 0                | 100%        | 38        |
| Altona Diagnostics GmbH                                                           | RealStar SARS-CoV02 RT-PCR Kits U.S.            | EUA/Commercial<br>4/22/20              | 63               | 0                | 100%        | 39        |
| Altru Diagnostics, Inc.                                                           | Altru Dx SARS-CoV-2 RT-PCR assay                | EUA/Single Lab<br>4/30/20              | 66               | 0                | 100%        | 40        |
| Biocerna                                                                          | SARS-CoV-2 Test                                 | EUA/Single Lab<br>4/28/20              | 30               | 0                | 100%        | 41        |
| Centers for Disease Control and Prevention                                        | CDC 2019-nCoV Real-Time RT-PCR Diagnostic Panel | EUA/Commercial<br>2/4/20               | 181              | 0                | 100%        | 42        |
| Charité–<br>Universitätsmedizin<br>Berlin/German Center<br>for Infection Research | "WHO Test" <sup>b</sup>                         | -                                      | 430              | 0                | 100%        | 43        |
| Diagnostic Molecular Laboratory,<br>Northwestern Medicine                         | SARS-Cov-2 Assay                                | EUA/Single Lab<br>4/2/20               | 58               | 0                | 100%        | 44        |
| Hologic, Inc.                                                                     | Panther Fusion SARS-CoV-2 Assay                 | EUA/Commercial<br>3/16/20              | 243              | 0                | 100%        | 45        |
| Infectious Disease Diagnostics Laboratory,<br>Children's Hospital of Philadelphia | SARS-CoV-2 RT-PCR test                          | EUA/Single Lab<br>4/2/20               | 30               | 0                | 100%        | 46        |
| LabGenomics Co., Ltd.                                                             | LabGun COVID-19 RT-PCR Kit                      | EUA/Commercial<br>4/29/20              | 229              | 0                | 100%        | 47        |
| Nationwide Children's Hospital                                                    | SARS-CoV-2 Assay                                | EUA/Single Lab<br>4/27/20              | 60               | 0                | 100%        | 48        |
| PerkinElmer, Inc.                                                                 | New Coronavirus Nucleic Acid Detection Kit      | EUA/Commercial<br>3/24/20, EUL 4/24/20 | 319              | 0                | 100%        | 49        |

**Table S1. continued**

| Laboratory or manufacturer                                   | Test                                                                          | Authorization                         | Negative samples | Positive results | Specificity | Reference |
|--------------------------------------------------------------|-------------------------------------------------------------------------------|---------------------------------------|------------------|------------------|-------------|-----------|
| Primerdesign Ltd.                                            | COVID-19 genesig Real-Time PCR assay                                          | EUA/Commercial<br>3/20/20, EUL 4/7/20 | 158              | 0                | 100%        | 50        |
| Rheonix, Inc.                                                | Rheonix COVID-19 MDx Assay                                                    | EUA/Commercial<br>4/29/20             | 60               | 0                | 100%        | 51        |
| Roche Molecular Systems, Inc.                                | cobas SARS-CoV-2                                                              | EUA/Commercial<br>3/12/20, EUL 4/3/20 | 283              | 0                | 100%        | 52        |
| SD Biosensor, Inc.                                           | Standard M nCoV Real-Time Detection Kit                                       | EUA/Commercial<br>4/23/20             | 126              | 0                | 100%        | 53        |
| SeaSun BioMaterials                                          | U-TOP COVID-19 Detection Kit                                                  | EUA/Commercial<br>4/27/20             | 181              | 0                | 100%        | 54        |
| Thermo Fisher Scientific, Inc.                               | TaqPath COVID-19 Combo Kit                                                    | EUA/Commercial<br>3/13/20             | 96               | 0                | 100%        | 55        |
| Wadsworth Center, New York State Department of Public Health | New York SARS-CoV-2 Real-time Reverse Transcriptase (RT)-PCR Diagnostic Panel | EUA/Commercial<br>2/29/20             | 165              | 0                | 100%        | 56        |
| Yale New Haven Hospital, Clinical Virology Laboratory        | SARS-CoV-2 PCR test                                                           | EUA/Single Lab<br>3/31/20             | 16               | 0                | 100%        | 57        |

<sup>a</sup> EUA = Emergency Use Authorization by the U.S. Food and Drug Administration, issued either for commercial products or for use by a single laboratory. EUL = Emergency Use Listing by the World Health Organization.

<sup>b</sup> Protocol for a test distributed by the World Health Organization (WHO), often referred to as the WHO test.

**Table S2. Estimates of false negative rates.**

| <b>Basis for estimate of false negative rate<sup>a</sup></b>                                                                                                                                                                                                                                                   | <b>Estimated rate<sup>a</sup></b> | <b>Reference</b> |
|----------------------------------------------------------------------------------------------------------------------------------------------------------------------------------------------------------------------------------------------------------------------------------------------------------------|-----------------------------------|------------------|
| RT-PCR detected 24 of 24 infected patients (apparently based on clinical observations).                                                                                                                                                                                                                        | 0%                                | 58               |
| Of 601 patients that tested positive by RT-PCR, 15 initially tested negative (2.5%); of 748 patients that tested positive by RT-PCR or were considered highly likely cases based on clinical symptoms and positive chest CT scans with dynamic changes on serial scans, 162 initially tested negative (21.7%). | 2.5-21.7%                         | 59               |
| Of 167 infected patients that tested positive by RT-PCR, 5 with positive chest CT had tested negative 2-8 days earlier.                                                                                                                                                                                        | 3.0%                              | 60               |
| Throat swabs from 128 patients were tested by RT-PCR every 2 days until all were positive on the 6th test. 36 (28.1%) were negative on the first swab, and the average over the first five tests was 11 (8.6%) negative.                                                                                       | 8.6%-28.1%                        | 61               |
| Of 64 patients that tested positive by RT-PCR, 6 initially tested negative.                                                                                                                                                                                                                                    | 9.4%                              | 62               |
| The pooled false negative rate in a meta-analysis of SARS-CoV-2 RT-PCR tests was 11%.                                                                                                                                                                                                                          | 11%                               | 63               |
| Of 71 pharyngeal swabs that tested positive by digital RT-PCR, 8 (11.3%) tested negative by RT-PCR; of 104 samples (including stool, serum and 1 sputum sample) that tested positive by digital RT-PCR, 19 (18.3%) tested negative by RT-PCR.                                                                  | 11.3-18.3%                        | 64               |
| Of 102 patients that tested positive by RT-PCR, 12 initially tested negative.                                                                                                                                                                                                                                  | 11.8%                             | 65               |
| Of 36 patients that tested positive by RT-PCR, 6 initially tested negative.                                                                                                                                                                                                                                    | 16.7%                             | 66               |
| Of 34 patients that tested positive by RT-PCR, 7 initially tested negative.                                                                                                                                                                                                                                    | 20.6%                             | 67               |
| Of 35-37 paired samples that included a saliva sample, a nasopharyngeal swab or both that tested positive by RT-PCR, 8 nasopharyngeal swabs tested negative.                                                                                                                                                   | 21.6-22.9%                        | 68               |
| Of 87 patients that tested positive by RT-PCR, 19 initially tested negative.                                                                                                                                                                                                                                   | 21.8%                             | 69               |
| Of 219 nasal swab samples taken 0-7 days after the onset of symptoms from 213 patients confirmed by the Guangdong CDC as infected, 51 tested negative by RT-PCR.                                                                                                                                               | 23.3%                             | 70               |
| Of 51 patients that tested positive by RT-PCR, 15 tested negative 0-6 days after symptom onset.                                                                                                                                                                                                                | 29.4%                             | 71               |
| Reported that the 5th edition of China's COVID-19 prevention and control guidelines states that the real-time RT-PCR test for SARS-CoV-2 has a false negative rate of at least 30%.                                                                                                                            | ≥30%                              | 72               |
| Estimated a 38% false negative rate in RT-PCR tests on the day of symptom onset.                                                                                                                                                                                                                               | 38%                               | 73               |
| Of 28 patients diagnosed as infected by the criteria of China's National Health Commission, 11 tested negative by RT-PCR.                                                                                                                                                                                      | 39.3%                             | 74               |
| Of 80 patients that tested positive by RT-PCR, 39 initially tested negative.                                                                                                                                                                                                                                   | 48.8%                             | 75               |
| Of 43 paired samples that included a sputum sample, a throat swab or both that tested positive by RT-PCR, 21 throat swabs tested negative.                                                                                                                                                                     | 48.8%                             | 76               |
| Of 1,324 patients that tested positive by RT-PCR, 691 initially tested negative.                                                                                                                                                                                                                               | 52.2%                             | 77               |

<sup>a</sup> From an online search for studies reporting false negative rates in SARS-CoV-2 RT-PCR testing, excluding studies with less than 20 infected patients.

**Table S3. False positives reported in four sensitivity or cross-reactivity assessments of SARS-CoV-2 RT-PCR assays: results per target gene.**

| <b>Test</b>      | <b>Target genes</b> | <b>Negative samples</b> | <b>Positive results</b> | <b>Reference</b> |
|------------------|---------------------|-------------------------|-------------------------|------------------|
| Charité          | E and RdRp          | 1198                    | 4                       | 43               |
| Charité          | E                   | 24                      | 0                       | 78, 79           |
| Charité          | RdRp                | 24                      | 0                       | 78, 79           |
| HKU              | N                   | 24                      | 0                       | 78, 79           |
| HKU              | nsp14               | 24                      | 0                       | 78, 79           |
| China CDC        | N                   | 24                      | 15                      | 78, 79           |
| China CDC        | nsp10               | 24                      | 6                       | 78, 79           |
| US CDC           | N1                  | 24                      | 0                       | 78, 79           |
| US CDC           | N2                  | 24                      | 6                       | 78, 79           |
| US CDC           | N3                  | 24                      | 18                      | 78, 79           |
| Charité          | E                   | 7                       | 0                       | 80               |
| Charité          | RdRp S              | 7                       | 0                       | 80               |
| Charité          | RdRp NS             | 7                       | 0                       | 80               |
| Charité          | N                   | 7                       | 7                       | 80               |
| HKU              | N                   | 7                       | 0                       | 80               |
| HKU              | ORF                 | 7                       | 0                       | 80               |
| China CDC        | N                   | 7                       | 0                       | 80               |
| China CDC        | ORF                 | 7                       | 0                       | 80               |
| US CDC           | N1                  | 7                       | 0                       | 80               |
| US CDC           | N2                  | 7                       | 7                       | 80               |
| US CDC           | N3                  | 7                       | 0                       | 80               |
| Institut Pasteur | Ip2 Multiplex       | 7                       | 0                       | 80               |
| Institut Pasteur | Ip2 Multiplex       | 7                       | 0                       | 80               |
| Charité          | E                   | 60                      | 0                       | 81               |
| Charité          | RdRp                | 60                      | 0                       | 81               |
| Charité          | N                   | 60                      | 60                      | 81               |
| US CDC           | N1                  | 60                      | 0                       | 81               |
| US CDC           | N2                  | 60                      | 60                      | 81               |
| US CDC           | N3                  | 60                      | 13                      | 81               |



**Table S4. False positives rates in four sensitivity or cross-reactivity assessments of SARS-CoV-2 RT-PCR assays.**

| <b>Tests</b>                                      | <b>Negative samples</b> | <b>Positive results</b> | <b>False positive rate</b> | <b>Reference</b> |
|---------------------------------------------------|-------------------------|-------------------------|----------------------------|------------------|
| Charité                                           | 1198                    | 4                       | 0.3%                       | 43               |
| Charité, HKU, China CDC, US CDC                   | 216                     | 45                      | 20.8%                      | 78, 79           |
| Charité, HKU, China CDC, US CDC, Institut Pasteur | 91                      | 14                      | 15.4%                      | 80               |
| Charité, US CDC                                   | 360                     | 133                     | 36.9%                      | 81               |

**Table S5. External quality assessments of RNA virus assays.**

| <b>Virus</b>          | <b>Date</b>  | <b>Labor-<br/>atories</b> | <b>Panels</b> | <b>Negative<br/>samples<br/>/panel</b> | <b>Negative<br/>samples</b> | <b>False<br/>positives</b> | <b>False<br/>positive<br/>rate<sup>a</sup></b> | <b>Labor-<br/>atories<br/>with false<br/>positives</b> | <b>Refer-<br/>ence</b> |
|-----------------------|--------------|---------------------------|---------------|----------------------------------------|-----------------------------|----------------------------|------------------------------------------------|--------------------------------------------------------|------------------------|
| SARS                  | 2004?        | 58                        | 58            | 3                                      | 174                         | 4-12                       | 2.3-6.8%                                       | 4                                                      | 82                     |
| MERS                  | spring 2014  | 99                        | 189           | 6                                      | 1,134                       | 11 <sup>b</sup>            | 1.0%                                           | 8                                                      | 83                     |
| MERS                  | 2015?        | 56                        | 56            | 3                                      | 168                         | 0                          | <0.6%                                          | 0                                                      | 84                     |
| MERS                  | 2017?        | 49                        | 49            | 1                                      | 49                          | 0                          | <2.0%                                          | 0                                                      | 85                     |
| Influenza A viruses   | Feb-Mar 2007 | 64                        | 64            | 2                                      | 128                         | 9                          | 7.0%                                           | 5-9                                                    | 86                     |
| Influenza A viruses   | Aug-Oct 2007 | 83                        | 83            | 4                                      | 332                         | 9                          | 2.7%                                           | 3-9                                                    | 86                     |
| Influenza A viruses   | Jan-Feb 2008 | 95                        | 95            | 2                                      | 190                         | 3                          | 1.6%                                           | 2-3                                                    | 86                     |
| Influenza A viruses   | Jun-Jul 2008 | 109                       | 109           | 2                                      | 218                         | 7                          | 3.2%                                           | 4-7                                                    | 86                     |
| Influenza A viruses   | Jan-Feb 2009 | 114                       | 114           | 1                                      | 114                         | 1                          | 0.9%                                           | 1                                                      | 87                     |
| Influenza A viruses   | Jan-Mar 2010 | 138                       | 138           | 1                                      | 138                         | 1                          | 0.7%                                           | 1                                                      | 88                     |
| Influenza A viruses   | Jun-Aug 2010 | 158                       | 158           | 1                                      | 158                         | 2                          | 1.3%                                           | 2                                                      | 88                     |
| Influenza A viruses   | Jan-Mar 2011 | 158                       | 316           | 2                                      | 316                         | 11                         | 3.5%                                           | 3-11                                                   | 89                     |
| Influenza A viruses   | Jun-Jul 2011 | 159                       | 159           | 1                                      | 159                         | 3                          | 1.9%                                           | 3                                                      | 89                     |
| Influenza A viruses   | Apr-Jun 2012 | 163                       | 163           | 1                                      | 163                         | 7                          | 4.3%                                           | 7                                                      | 90                     |
| Influenza A viruses   | Apr-Jun 2013 | 158                       | 158           | 1                                      | 158                         | 4                          | 2.5%                                           | 4                                                      | 91                     |
| Influenza A viruses   | Apr-Jun 2014 | 156                       | 156           | 1                                      | 156                         | 6                          | 3.8%                                           | 6                                                      | 92                     |
| Influenza A viruses   | Apr-Jun 2015 | 153                       | 153           | 1                                      | 153                         | 3                          | 2.0%                                           | 3                                                      | 93                     |
| Influenza A viruses   | Apr-Jun 2016 | 151                       | 151           | 1                                      | 151                         | 1                          | 0.7%                                           | 1                                                      | 94                     |
| Influenza A viruses   | Apr-Jun 2017 | 160                       | 160           | 1                                      | 160                         | 3                          | 1.9%                                           | 3                                                      | 95                     |
| Influenza A viruses   | May-Jun 2018 | 174                       | 174           | 1                                      | 174                         | 0                          | <0.6%                                          | 0                                                      | 96                     |
| Influenza A viruses   | May-Jul 2019 | 172                       | 172           | 1                                      | 172                         | 2                          | 1.2%                                           | 2                                                      | 97                     |
| HCV                   | Jan 2005     | 78                        | 78            | 9                                      | 702                         | 49                         | 7.0%                                           | 6-49                                                   | 98                     |
| HCV                   | Feb 2005     | 84                        | 84            | 7                                      | 588                         | 29                         | 4.9%                                           | 5-29                                                   | 98                     |
| HCV                   | 2005?        | 5                         | 119           | 1                                      | 119                         | 4                          | 3.4%                                           | 3                                                      | 99                     |
| HCV                   | Jan 2006     | 96                        | 96            | 7                                      | 672                         | 47                         | 7.0%                                           | 7-47                                                   | 98                     |
| HCV                   | Feb 2006     | 89                        | 89            | 6                                      | 534                         | 11                         | 2.1%                                           | 2-11                                                   | 98                     |
| HCV                   | 2006?        | 20                        | 21            | 1                                      | 21                          | 0                          | <4.8%                                          | 0                                                      | 100                    |
| HCV                   | Jan 2007     | 104                       | 104           | 7                                      | 728                         | 22                         | 3.0%                                           | 4-22                                                   | 98                     |
| HCV                   | Feb 2007     | 99                        | 99            | 7                                      | 693                         | 28                         | 4.0%                                           | 4-28                                                   | 98                     |
| Hepatitis Delta virus | 2015?        | 28                        | 56            | 4                                      | 112                         | 6                          | 5.4%                                           | 5                                                      | 101                    |
| Chikungunya virus     | 2007?        | 31                        | 36            | 3                                      | 108                         | 2-6                        | 1.9-5.6%                                       | 2                                                      | 102                    |
| Chikungunya virus     | Sep 2014     | 56                        | 60            | 5                                      | 297                         | 24                         | 8.1%                                           | 18                                                     | 103                    |

**Table S5. continued**

| <b>Virus</b>               | <b>Date</b>  | <b>Labor-<br/>atories</b> | <b>Panels</b>    | <b>Negative<br/>samples<br/>/panel</b> | <b>Negative<br/>samples</b> | <b>False<br/>positives</b> | <b>False<br/>positive<br/>rate<sup>a</sup></b> | <b>Labor-<br/>atories<br/>with false<br/>positives</b> | <b>Refer-<br/>ence</b> |
|----------------------------|--------------|---------------------------|------------------|----------------------------------------|-----------------------------|----------------------------|------------------------------------------------|--------------------------------------------------------|------------------------|
| Chikungunya, Dengue        | Feb-May 2015 | 20                        | 20               | 2                                      | 40                          | 1                          | 2.5%                                           | 1                                                      | 104                    |
| Dengue virus               | May-Jul 2013 | 16                        | 16               | 1                                      | 16                          | 1 <sup>c</sup>             | 6.3%                                           | 1                                                      | 105                    |
| Zika virus                 | Oct-Nov 2016 | 50                        | 85               | 6                                      | 504 <sup>c</sup>            | 14 <sup>d</sup>            | 2.8%                                           | 12                                                     | 106                    |
| Rift Valley fever virus    | 2012         | 30                        | 39               | 3                                      | 117                         | 4                          | 3.4%                                           | 3                                                      | 107                    |
| Measles virus              | Aug 2014     | 41                        | 41               | 3                                      | 123                         | 1                          | 0.8%                                           | 1                                                      | 108                    |
| Ebola virus                | Aug 2014     | 82                        | 106 <sup>e</sup> | 3                                      | 317 <sup>e</sup>            | 1                          | 0.3%                                           | 1                                                      | 109                    |
| Ebola virus                | Dec 2014     | 19                        | 20               | 3                                      | 60                          | 0                          | <1.7%                                          | 0                                                      | 110                    |
| Ebola virus                | Apr 2015     | 3                         | 3                | 1                                      | 3                           | 0                          | <33.3%                                         | 0                                                      | 5                      |
| Ebola virus                | Nov 2014     | 6                         | 6                | 1                                      | 6                           | 1                          | 16.7%                                          | 1                                                      | 5                      |
| Ebola virus                | Mar 2016     | 9                         | 9                | 1                                      | 9                           | 0                          | <11.1%                                         | 0                                                      | 5                      |
| 4 arboviruses <sup>f</sup> | Nov 2017     | 51                        | 51               | 4                                      | 204                         | 10                         | 4.9%                                           | 6                                                      | 111                    |

<sup>a</sup> "<" indicates a false positive rate below the detection limit (calculated as the reciprocal of the number of negative samples); treated as zero in the analyses.

<sup>b</sup> A majority of the laboratories in this study used a confirmatory second target in accordance with a World Health Organization recommendation; some used sequencing for confirmation.

<sup>c</sup> This was an equivocal result by a laboratory using real-time RT-PCR, scored as a positive result by the external quality assessment.

<sup>d</sup> Inconclusive results are not included in these figures.

<sup>e</sup> Not including two panels that were tested only for filovirus.

<sup>f</sup> Toscana virus, West Nile virus, Usutu virus and Tick-borne Encephalitis virus.

## References

- 1 Qian Y, Zeng T, Wang H, Xu M, Chen J, Hu N, Chen D, Liu Y. Safety management of nasopharyngeal specimen collection from suspected cases of coronavirus disease 2019. *Int J Nurs Sci* 2020. DOI: 10.1016/j.ijnss.2020.03.012
- 2 Lippi G, Simundic AM, Plebani M. Potential preanalytical and analytical vulnerabilities in the laboratory diagnosis of coronavirus disease 2019 (COVID-19). *Clin Chem Lab Med* 2020 March 16 (Epub ahead of print).
- 3 Fact Sheet for Patients: CDC - 2019-nCoV Real-Time RT-PCR Diagnostic Panel. U.S. Centers for Disease Control and Prevention. <https://www.cdc.gov/coronavirus/2019-ncov/downloads/Factsheet-for-Patients-2019-nCoV.pdf> (2020).
- 4 Johnson, C.Y. A 'negative' coronavirus test result doesn't always mean that you aren't infected. *Washington Post* <https://www.washingtonpost.com/science/2020/03/26/negative-coronavirus-test-result-doesnt-always-mean-you-arent-infected/> (2020).
- 5 Lau KA, Theis T, Gray J, Rawlinson WD. Ebola preparedness: diagnosis improvement using rapid approaches for proficiency testing. *J Clin Microbiol* 2017;55:783-90.
- 6 Patrick DM, Petric M, Skowronski DM, Guasparini R, Booth TF, Krajden M, McGeer P, Bastien N, Gustafson L, Dubord J, MacDonald D. An outbreak of human coronavirus OC43 infection and serological cross-reactivity with SARS coronavirus. *Canadian Journal of Infectious Diseases and Medical Microbiology*. 2006;17(6):330-6.
- 7 Koetz A, Nilsson P, Lindén MV, Van Der Hoek L, Ripa T. Detection of human coronavirus NL63, human metapneumovirus and respiratory syncytial virus in children with respiratory tract infections in south-west Sweden. *Clinical microbiology and infection*. 2006 Nov 1;12(11):1089-96.
- 8 Wang Y, Wang Y, Chen Y, Qin Q. Unique epidemiological and clinical features of the emerging 2019 novel coronavirus pneumonia (COVID-19) implicate special control measures. *J Med Virol*. 2020;92(6):568-576. doi: 10.1002/jmv.25748
- 9 Molloy PJ, Persing DH, Berardi VP. False-positive results of PCR testing for Lyme disease. *Clin Infect Dis*. 2001;33(3):412-413. doi: 10.1086/321911
- 10 World Health Organization. Use of laboratory methods for SARS diagnosis. <https://www.who.int/csr/sars/labmethods/en/#lab>
- 11 U.S. Centers for Disease Control and Prevention. Public Health Guidance for Community-Level Preparedness and Response to Severe Acute Respiratory Syndrome (SARS). Version 2. Supplement F: Laboratory Guidance. May 21, 2004.
- 12 World Health Organization. Laboratory testing for coronavirus disease (COVID-19) in suspected human cases. Interim guidance 19 March 2020.
- 13 U.S. Centers for Disease Control and Prevention. Evaluating and testing persons for Coronavirus Disease 2019 (COVID-19). Revised May 3, 2020. <https://www.cdc.gov/coronavirus/2019-nCoV/hcp/clinical-criteria.html>
- 14 Council of State and Territorial Epidemiologists. Standardized surveillance case definition and national notification for 2019 novel coronavirus disease (COVID-19). Technical Supplement: Interim-20-ID-01.
- 15 World Health Organization. Laboratory testing strategy recommendations for COVID-19. Interim guidance 21 March 2020.
- 16 World Health Organization. Global surveillance for COVID-19 caused by human infection with COVID-19 virus. Interim guidance 20 March 2020.
- 17 Lassaunière R, Frische A, Harboe ZB, Nielsen AC, Fomsgaard A, Krogfelt KA, Jørgensen CS. Evaluation of nine commercial SARS-CoV-2 immunoassays. medRxiv; Jan 1, 2020. DOI: 10.1101/2020.04.09.20056325.
- 18 Harris R. Antibody tests for coronavirus can miss the mark. *National Public Radio*; Apr 15, 2020. <https://www.npr.org/sections/health-shots/2020/04/15/834497497/antibody-tests-for-coronavirus-can-miss-the-mark> (accessed May 5, 2020).
- 19 Hagmann D, Loewenstein G, Ubel PA. Antibody tests might be deceptively dangerous. Blame the math. *Washington Post*; Apr 30, 2020. <https://www.washingtonpost.com/outlook/2020/04/30/antibody-tests-might-be-deceptively-dangerous-blame-math/> (accessed May 5, 2020).
- 20 Chen C, Allen M, Churchill L, Arnsdorf I. Key missteps at the CDC have set back its ability to detect the potential spread of coronavirus. *ProPublica*; Feb 28, 2020. <https://www.propublica.org/article/cdc-coronavirus-covid-19-test> (accessed May 5, 2020).

- 21 Willman D. Contamination at CDC lab delayed rollout of coronavirus tests. *Washington Post*; Apr 18, 2020. [https://www.washingtonpost.com/investigations/contamination-at-cdc-lab-delayed-rollout-of-coronavirus-tests/2020/04/18/fd7d3824-7139-11ea-aa80-c2470c6b2034\\_story.html](https://www.washingtonpost.com/investigations/contamination-at-cdc-lab-delayed-rollout-of-coronavirus-tests/2020/04/18/fd7d3824-7139-11ea-aa80-c2470c6b2034_story.html) (accessed May 5, 2020).
- 22 McNeil DG Jr. Did federal officials really question W.H.O. tests for coronavirus? *New York Times*; Mar 17, 2020. <https://www.nytimes.com/2020/03/17/health/coronavirus-tests-who.html> (accessed May 5, 2020).
- 23 Harris R. In defense of coronavirus testing strategy, Administration cited retracted study. *National Public Radio*; Mar 26, 2020. <https://www.npr.org/sections/health-shots/2020/03/26/822084429/in-defense-of-coronavirus-testing-strategy-administration-cited-retracted-study> (accessed Apr 24, 2020).
- 24 Zhuang G, Shen M, Zeng L, et al. [Potential false-positive rate among the 'asymptomatic infected individuals' in close contacts of COVID-19 patients.] *Chin J Epidemiol* 2020;41:485-8 [retracted].
- 25 Rabin RC. Westerdam passengers at low risk of coronavirus infection, C.D.C. says. *New York Times*; Feb 24, 2020. <https://www.nytimes.com/2020/02/24/health/coronavirus-westerdam-cdc.html> (accessed May 5, 2020).
- 26 Anonymous. Child Now Testing Negative For Coronavirus; Initial Test Believed False-Positive. *CBS Los Angeles*; Mar 16, 2020. <https://losangeles.cbslocal.com/2020/03/16/coronavirus-child-testing-negative-false-positive/> (accessed May 5, 2020).
- 27 Anonymous. Employee at Betel Home was false positive for COVID-19, says chief public health officer. *CBC News*; Apr 5, 2020. <https://www.cbc.ca/news/canada/manitoba/manitoba-covid-19-update-april-5-1.5522614> (accessed May 16, 2020).
- 28 Anonymous. No new COVID-19 cases, 1 false positive on Easter Sunday. *CBC News*; Apr 12, 2020. <https://www.cbc.ca/news/canada/manitoba/manitoba-covid-19-update-1.5530389> (accessed May 16, 2020).
- 29 Davis G. Coronavirus: Lab error could have resulted in false positives in Peterborough, City of Kawartha Lakes. *Global News*; May 1, 2020. <https://globalnews.ca/news/6894706/coronavirus-peterborough-lab-error-false-positives/> (accessed May 16, 2020).
- 30 Brown B. Supposed COVID-19 case in Nunavut deemed false positive; top doctor apologizes; territory again has no confirmed cases of the illness. *CBC News*; May 4, 2020. <https://www.cbc.ca/news/canada/north/covid-19-nunavut-false-positive-1.5554545> (accessed May 16, 2020).
- 31 Last J. Why some COVID-19 tests return false positives; cross-contamination in labs is the most likely culprit. *CBC News*; May 5, 2020. <https://www.cbc.ca/news/canada/north/covid-19-false-positives-1.5555322> (accessed May 16, 2020).
- 32 Frketich J. COVID-19 outbreaks in doubt as more false positive tests found in Hamilton. *The Hamilton Spectator*; May 11, 2020. <https://www.thespec.com/news/hamilton-region/2020/05/11/covid-19-hamilton-latest-news.html> (accessed May 16, 2020).
- 33 Anonymous. Renfrew's Bonnechere Manor coronavirus case was false-positive. *Renfrew Mercury*; May 15, 2020. <https://www.insideottawavalley.com/news-story/9989090-renfrew-s-bonnechere-manor-coronavirus-case-was-false-positive/> (accessed May 16, 2020).
- 34 Weaver C. Questions About Accuracy of Coronavirus Tests Sow Worry. *Wall Street Journal*; Apr 2, 2020. <https://www.wsj.com/articles/questions-about-accuracy-of-coronavirus-tests-sow-worry-11585836001> (accessed May 16, 2020).
- 35 Keefe B, Basye L. 'Positive then negative, four hours apart': Accuracy of COVID-19 testing in question. *11Alive (Atlanta)*; May 7, 2020. <https://www.11alive.com/article/news/health/coronavirus/investigation-into-false-positive-and-negative-covid-19-tests/85-1717bb7e-431c-4b2d-89c4-2297526c0cc0> (accessed May 16, 2020).
- 36 Moodie J. Sudbury's health unit confident in testing program. *Sudbury Star*; May 15, 2020. <http://eedition.thesudburystar.com/epaper/viewer.aspx> (accessed May 16, 2020).
- 37 ID NOW COVID-19 ; Instructions for Use. Abbott Diagnostics Scarborough, Inc. 2020.
- 38 Abbott RealTime SARS-CoV-2; Instructions for Use. Abbott Molecular, Inc. 2020.
- 39 RealStar® SARS-CoV-2 RT-PCR Kit U.S. Instructions for Use, Version 6.0. Altona Diagnostics GmbH 2020.
- 40 Accelerated Emergency Use Authorization (EUA) Summary: Thermo Fisher TaqMan 2019-nCoV Assay Kit v1 (singleplex). Altru Diagnostics, Inc. 2020.
- 41 Accelerated Emergency Use Authorization (EUA) Summary: Modified Thermo Fisher TaqPath COVID-19 SARS-CoV-2 Test. Biocerna 2020.
- 42 CDC 2019-Novel Coronavirus (2019-nCoV) Real-Time RT-PCR Diagnostic Panel; Instructions for Use. Centers for Disease Control and Prevention 2020.
- 43 Corman VM, Landt O, Kaiser M, et al. Detection of 2019 novel coronavirus (2019-nCoV) by real-time RT-PCR. *Euro Surveill* 2020;25:2000045.

- 44 Northwestern Medicine SARS-CoV-2 Assay EUA Summary: Accelerated Emergency Use Authorization (EUA) Summary SARS-CoV-2 Assay. Diagnostic Molecular Laboratory, Northwestern Medicine 2020.
- 45 SARS-CoV-2 Assay (Panther Fusion® System). Hologic, Inc. 2020.
- 46 CHOP SARS-CoV-2 test EUA Summary: Accelerated Emergency Use Authorization (EUA) Summary SARS-CoV-2 RT-PCR Test. Infectious Disease Diagnostics Laboratory, Children's Hospital of Philadelphia 2020.
- 47 Instructions for LabGun™ COVID-19 RT-PCR Kit; Instructions for Use. LabGenomics Co., Ltd. 2020.
- 48 Nationwide Children's Hospital SARS-CoV-2 Assay EUA Summary: Accelerated Emergency Use Authorization (EUA) Summary SARS-CoV-2 ASSAY. Nationwide Children's Hospital 2020.
- 49 Instructions for PerkinElmer® New Coronavirus Nucleic Acid Detection Kit, v 3.0. PerkinElmer, Inc. 2020.
- 50 Primerdesign Ltd COVID-19 genesig® Real-Time PCR assay; Instructions for Use (IFU) Issue 1.02. Primerdesign Ltd. 2020.
- 51 Rheonix COVID-19™ MDx Assay: For use only with the Rheonix Encompass MDx® Workstation; Instructions for Use. Rheonix, Inc. 2020.
- 52 cobas® SARS-CoV-2: Qualitative assay for use on the cobas® 6800/8800 Systems. Roche Molecular Systems, Inc. 2020.
- 53 STANDARD M nCoV Real-Time Detection kit; Instructions for Use. SD Biosensor, Inc. 2020.
- 54 U-TOPTM COVID-19 Detection Kit: A diagnostic kit for detection of SARS-CoV-2 (COVID-19) in clinical samples using Real-time PCR; Instructions for Use, V2.0. SeaSun BioMaterials 2020.
- 55 TaqPath™ COVID-19 Combo Kit: INSTRUCTIONS FOR USE: Multiplex real-time RT-PCR test intended for the qualitative detection of nucleic acid from SARS-CoV-2, Version C.0. Thermo Fisher Scientific, Inc. 2020.
- 56 New York SARS-CoV-2 Real-time Reverse Transcriptase (RT)- PCR Diagnostic Panel; Instructions for Use. Wadsworth Center, New York State Department of Public Health 2020.
- 57 Yale New Haven Hospital SARS-CoV-2 assay EUA Summary: Accelerated Emergency Use Authorization (EUA) Summary SARS-CoV-2 RT-PCR Assay. Yale New Haven Hospital, Clinical Virology Laboratory 2020.
- 58 Liu L, Zhang D, Tang S, et al. The epidemiological and clinical characteristics of 2019 novel coronavirus infection in Changsha, China. Available at SSRN: <https://ssrn.com/abstract=3537093> (accessed on Apr 24, 2020).
- 59 Ai T, Yang Z, Hou H, et al. Correlation of Chest CT and RT-PCR Testing in Coronavirus Disease 2019 (COVID-19) in China: A Report of 1014 Cases. *Radiology* 2020; DOI: 10.1148/radiol.2020200642.
- 60 Xie X, Zhong Z, Zhao W, Zheng C, Wang F, Liu J. Chest CT for Typical 2019-nCoV Pneumonia: Relationship to Negative RT-PCR Testing. *Radiology* 2020; DOI: 10.1148/radiol.2020200343.
- 61 Luo L, Liu D, Liao X-L, et al. Modes of contact and risk of transmission in COVID-19 among close contacts. *medRxiv* 2020; DOI: 10.1101/2020.03.24.20042606.
- 62 Wong HY, Lam HY, Fong AH, et al. Frequency and distribution of chest radiographic findings in COVID-19 positive patients. *Radiol* 2020; published online Mar 27, 2020. DOI: 10.1148/radiol.2020201160.
- 63 Kim H, Hong H, Yoon SH. Diagnostic performance of CT and reverse transcriptase-polymerase chain reaction for Coronavirus Disease 2019: a meta-analysis. *Radiol* 2020; published online Apr 17, 2020. DOI: 10.1148/radiol.2020201343.
- 64 Lu R, Wang J, Li M, Wang L, Dong J, Cai W. SARS-CoV-2 detection using digital PCR for COVID-19 diagnosis, treatment monitoring and criteria for discharge. *medRxiv* 2020; DOI: 10.1101/2020.03.24.20042689.
- 65 Bernheim A, Mei X, Huang M, et al. Chest CT findings in coronavirus disease-19 (COVID-19): relationship to duration of infection. *Radiol* 2020; published online Feb 20, 2020. DOI: <https://doi.org/10.1148/radiol.2020200463>.
- 66 Long C, Xu H, Shen Q, Zhang X, Fan B, Wang C, Zeng B, Li Z, Li X, Li H. Diagnosis of the Coronavirus disease (COVID-19): rRT-PCR or CT? *Eur J Radiol* 2020; DOI: 10.1016/j.ejrad.2020.108961.
- 67 He J-L, Luo L, Luo Z-D, et al. Diagnostic performance between CT and initial real-time RT-PCR for clinically suspected 2019 coronavirus disease (COVID-19) patients outside Wuhan, China. *Respiratory Med* (2020). <https://doi.org/10.1016/j.rmed.2020.105980> (accessed Apr 24, 2020).
- 68 Wyllie AL, Fournier J, Casanovas-Massana A, Campbell M, Tokuyama M, Vijayakumar P, Geng B, Muenker MC, Moore AJ, Vogels CB, Petrone ME. Saliva is more sensitive for SARS-CoV-2 detection in COVID-19 patients than nasopharyngeal swabs. *medRxiv*; 2020. DOI: 10.1101/2020.04.16.20067835.
- 69 Ren X, Liu Y, Chen H, et al. Application and Optimization of RT-PCR in Diagnosis of SARS-CoV-2 Infection. *medRxiv* 2020. <https://doi.org/10.1101/2020.02.25.20027755> (accessed Apr 24, 2020).

- 70 Yang Y, Yang M, Shen C, et al. Evaluating the accuracy of different respiratory specimens in the laboratory diagnosis and monitoring the viral shedding of 2019-nCoV infections. *medRxiv* 2020; DOI: 10.1101/2020.02.11.20021493.
- 71 Fang Y, Zhang H, Xie J, et al. Sensitivity of Chest CT for COVID-19: Comparison to RT-PCR. *Radiology* 2020; DOI: 10.1148/radiol.2020200432.
- 72 Yang H, Wang C, Poon LC. Novel coronavirus infection and pregnancy. *Ultrasound Obstet Gynecol* 2020;55:435.
- 73 Kucirka L, Lauer S, Laeyendecker O, Boon D, Lessler J. Variation in False-Negative Rate of Reverse Transcriptase Polymerase Chain Reaction–Based SARS-CoV-2 Tests by Time Since Exposure. *Annals of Internal Medicine* 2020; DOI: 10.7326/M20-1495.
- 74 Yu H, Li D, Deng Z, et al. Total protein as a biomarker for predicting coronavirus disease-2019 pneumonia. Available at SSRN: <https://ssrn.com/abstract=3551289> (accessed on Apr 24, 2020).
- 75 Wu J, Liu J, Zhao X, et al. Clinical characteristics of imported cases of Coronavirus Disease 2019 (COVID-19) in Jiangsu Province: a multicenter descriptive study. *Clin Infect Dis* 2020. DOI: 10.1093/cid/ciaa199.
- 76 Lin C, Xiang J, Yan M, Li H, Huang S, Shen C. Comparison of throat swabs and sputum specimens for viral nucleic acid detection in 52 cases of novel coronavirus (SARS-Cov-2)-infected pneumonia (COVID-19). *Clin Chem Lab Med* 2020 April 16 (Epub ahead of print).
- 77 Xu H, Yan L, Qiu CM, Jiao B, Chen Y, Tan X, Chen Z, Ai L, Xiao Y, Luo A, Li S. Analysis and Prediction of False Negative Results for SARS-CoV-2 Detection with Pharyngeal Swab Specimen in COVID-19 Patients: A Retrospective Study. *medRxiv*; 2020. DOI: 10.1101/2020.03.26.20043042
- 78 Vogels CB, Brito AF, Wyllie AL, Fauver JR, Ott IM, Kalinich CC, Petrone ME, Landry ML, Foxman EF, Grubaugh ND. Analytical sensitivity and efficiency comparisons of SARS-COV-2 qRT-PCR assays. *medRxiv*. 2020 Apr 1. DOI: 10.1101/2020.03.30.20048108.
- 79 Vogels CB, Brito AF, Wyllie AL, Fauver JR, Ott IM, Kalinich CC, Petrone ME, Landry ML, Foxman EF, Grubaugh ND. Analytical sensitivity and efficiency comparisons of SARS-COV-2 qRT-PCR assays. *medRxiv*. 2020 Apr 26. DOI: 10.1101/2020.03.30.20048108.
- 80 Etievant S, Bal A, Escurret V, Brengel-Pesce K, Bouscambert M, Cheynet V, Generenaz L, Oriol G, Destras G, Billaud G, Josset L. Sensitivity assessment of SARS-CoV-2 PCR assays developed by WHO referral laboratories. *medRxiv*. 2020 Jan 1. DOI: 10.1101/2020.05.03.20072207.
- 81 Barra GB, Santa Rita TH, Mesquita PG, Jacomo RH, Nery LF. Analytical sensibility and specificity of two RT-qPCR protocols for SARS-CoV-2 detection performed in an automated workflow. *medRxiv*; 2020. DOI: 10.1101/2020.03.07.20032326.
- 82 Drosten C, Doerr HW, Lim W, Stöhr K, Niedrig M. SARS molecular detection external quality assurance. *Emerg Infect Dis* 2004;10:2200-3.
- 83 Pas SD, Patel P, Reusken C, et al. First international external quality assessment of molecular diagnostics for MERS-CoV. *J Clin Virol* 2015;69:81-5.
- 84 Zhang L, Hao M, Zhang K, et al. External quality assessment for the molecular detection of MERS-CoV in China. *J Clin Virol* 2016;75:5-9.
- 85 Zhou D, Luo J. Construction of Lentivirus-based reference material for RT-PCR detection of Middle East Respiratory Syndrome Coronavirus and Its application in external quality assessment. *Adv Microbiol* 2018;8:506-18.
- 86 World Health Organization. WHO external quality assessment project for the detection of subtype influenza A viruses by polymerase chain reaction—summary analysis, 2007 and 2008. *Wkly Epidemiol Rec* 2008;83:401-12.
- 87 World Health Organization. WHO external quality assessment project for detecting influenza virus subtype A by polymerase chain reaction—summary analysis, 2009. *Wkly Epidemiol Rec* 2009;84:493-504.
- 88 World Health Organization. WHO external quality assessment for detecting influenza A virus using polymerase chain reaction—summary, 2010. *Wkly Epidemiol Rec* 2011;86:17-24.
- 89 World Health Organization. Detection of influenza virus subtype A by polymerase chain reaction: WHO external quality assessment project summary analysis, 2011. *Wkly Epidemiol Rec* 2012;87:29-36.
- 90 World Health Organization. Detection of influenza virus subtype A by polymerase chain reaction: WHO external quality assessment programme summary analysis, 2012. *Wkly Epidemiol Rec* 2013;88:37-48.
- 91 World Health Organization. Detection of influenza virus subtype A by polymerase chain reaction: WHO external quality assessment programme summary analysis, 2013. *Wkly Epidemiol Rec* 2014;89:37-44.
- 92 World Health Organization. Detection of influenza virus subtype A by polymerase chain reaction: WHO external quality assessment programme summary analysis, 2014. *Wkly Epidemiol Rec* 2015;90:9-16.

- 93 World Health Organization. Detection of influenza virus subtype A by polymerase chain reaction: WHO external quality assessment programme summary analysis, 2015. *Wkly Epidemiol Rec* 2016;90:3-11.
- 94 World Health Organization. Detection of influenza virus subtype A by polymerase chain reaction: WHO external quality assessment programme summary analysis, 2016. *Wkly Epidemiol Rec* 2017;92:37-44.
- 95 World Health Organization. Detection of influenza viruses by reverse transcription polymerase chain reaction: WHO external quality assessment programme summary analysis, 2017. *Wkly Epidemiol Rec* 2018;93:9-16.
- 96 World Health Organization. Detection of influenza viruses by reverse transcription polymerase chain reaction: WHO external quality assessment programme summary analysis, 2017. *Wkly Epidemiol Rec* 2019;94:53-64.
- 97 World Health Organization. Detection of influenza viruses by reverse transcription polymerase chain reaction: WHO external quality assessment programme summary analysis, 2019. *Wkly Epidemiol Rec* 2010;95:49-60.
- 98 Tvorogova MG, Chulanov VP, Volkova RA, et al. [Quality assessment of HCV RNA detection by PCR method in Federal System of External Quality Assessment in 2005-2007]. *J Microbiol Epidemiol Immunobiol* 2009;2009:59-62.
- 99 Caliendo AM, Valsamakis A, Zhou Y, et al. Multilaboratory comparison of Hepatitis C Virus viral load assays. *J Clin Microbiol* 2006;44:1726-32.
- 100 Laperche S, Bouchardeau F, Thibault V, et al. Multicenter trials need to use the same assay for hepatitis C virus viral load determination. *J Clin Microbiol* 2007;45:3788-90.
- 101 Le Gal F, Brichtler S, Sahli R, Chevret S, Gordien E. First international external quality assessment for Hepatitis Delta Virus RNA quantification in plasma. *Hepatology* 2016;64:1483-94.
- 102 Panning M, Charrel RN, Mantke OD, Landt O, Niedrig M, Drosten C. Coordinated implementation of Chikungunya virus reverse transcription-PCR. *Emerg Infect Dis* 2009;15:469-71.
- 103 Jacobsen S, Patel P, Schmidt-Chanasit J, et al. External quality assessment studies for laboratory performance of molecular and serological diagnosis of Chikungunya Virus infection. *J Clin Virol* 2016;76:55-65.
- 104 Soh LT, Squires RC, Tan LK, et al. External quality assessment of dengue and chikungunya diagnostics in the Asia Pacific region, 2015. *Western Pac Surveill Response J* 2016;7:26-34.
- 105 Pok KY, Squires RC, Tan LK, et al. First round of external quality assessment of dengue diagnostics in the WHO Western Pacific Region, 2013. *Western Pac Surveill Response J* 2015;6:73-81.
- 106 Charrel R, Mögling R, Pas S, et al. Variable sensitivity in molecular detection of Zika Virus in European expert laboratories: external quality assessment, November 2016. *J Clin Microbiol* 2017;55:3219-26.
- 107 Escadafal C, Paweska JT, Grobbelaar A, et al. International external quality assessment of molecular detection of Rift Valley Fever Virus. *PLoS Negl Trop Dis* 2013;7:e2244.
- 108 Zhang D, Sun Y, Jia T, et al. External quality assessment for the detection of measles virus by reverse transcription-PCR using armored RNA. *Plos One* 2015;10:e0134681.
- 109 Ellerbrok H, Jacobsen S, Patel P, et al. External quality assessment study for ebolavirus PCR-diagnostic promotes international preparedness during the 2014-2016 Ebola outbreak in West Africa. *PLoS Negl Trop Dis* 2017;11:e0005570.
- 110 Wang G, Sun Y, Zhang K, et al. External quality assessment of molecular detection of Ebola Virus in China. *PloS One* 2015;10:e0132659.
- 111 Reusken C, Baronti C, Mögling R, Papa A, Leitmeyer K, Charrel RN. Toscana, West Nile, Usutu and tick-borne encephalitis viruses: external quality assessment for molecular detection of emerging neurotropic viruses in Europe, 2017. *Euro Surveill* 2019;24:pii=1900051.
